# Supplementary material for: Spatiotemporal depletion of tumor-associated immune checkpoint PD-L1 with near-infrared photoimmunotherapy promotes antitumor immunity
Source: PubMed Central journal article supplement (PMC8559243; doi:10.1136/jitc-2021-003036), 2021-10-28
Supplement: jitc-2021-003036supp001.pdf [file jitc-2021-003036supp001.pdf]

# Supplementary Information

## **Spatiotemporal depletion of tumor-associated immune checkpoint PD-L1 with near infrared photoimmunotherapy promote antitumor immunity**

Shunichi Taki<sup>1,#</sup>, Kohei Matsuoka<sup>2</sup>, Yuko Nishinaga<sup>1</sup>, Kazuomi Takahashi<sup>1</sup>, Hirotohi Yasui<sup>1</sup>, Chiaki Koike<sup>3</sup>, Misae Shimizu<sup>3</sup>, Mitsuo Sato<sup>2</sup>, Kazuhide Sato<sup>1,3,4,5,6 # \*</sup>

<sup>1</sup> Respiratory Medicine, Nagoya University Graduate School of Medicine

<sup>2</sup> Department of Integrated Health Sciences, Nagoya University Graduate School of Medicine, Nagoya, Japan

<sup>3</sup> Nagoya University Institute for Advanced Research, Advanced Analytical and Diagnostic Imaging Center (AADIC) / Medical Engineering Unit (MEU), B3 Unit

<sup>4</sup> Nagoya University Institute of Nano-Life-Systems, Institutes of Innovation for Future Society

<sup>5</sup> FOREST-Souhatsu, CREST, JST

<sup>6</sup> Nagoya University Institute for Advanced Research, S-YLC

# These authors contributed equally

\* Correspondence should be addressed to: Kazuhide Sato, M.D., Ph.D. Institute for Advanced Research, Department of Respiratory Medicine, Graduate School of Medicine, Nagoya University, Nagoya, Aichi, 466-8550, Japan,

Phone: +81-052-744-2167; Fax: +81-052-744-2176;

E-mail: k-sato@med.nagoya-u.ac.jp

## Supplementary Figure 1

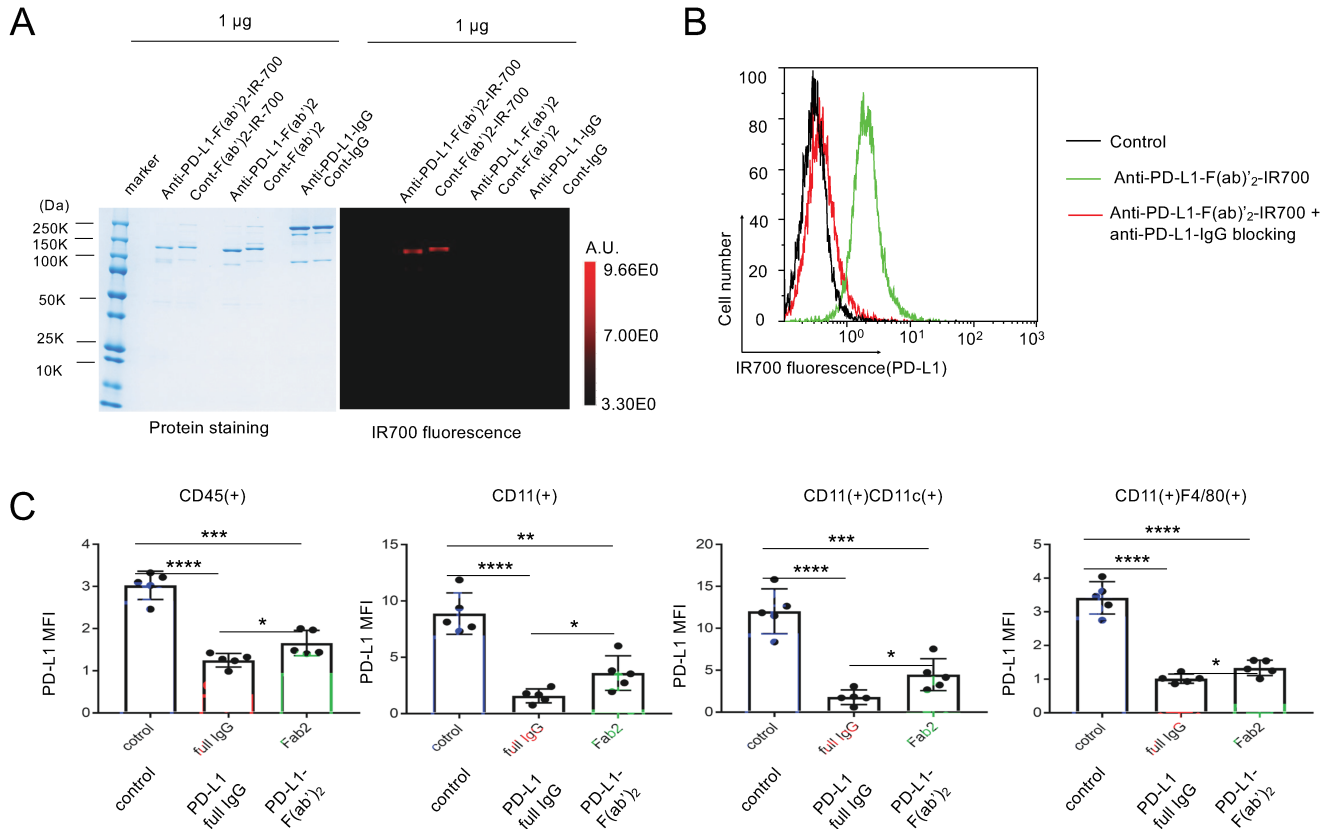

**Supplementary Figure 1**  
Production of Fc-deficient anti-PD-L1- F(ab')<sub>2</sub>-IR700 and evaluation *in vivo*.

(A) Validation of conjugated PD-L1-F(ab')<sub>2</sub>-IR700 with SDS-PAGE (left: colloidal blue staining, right: 700 nm-fluorescence image).

(B) PD-L1-F(ab')<sub>2</sub>-IR700 specifically bind on PD-L1. To block the PD-L1 on the PD-L1-overexpressed LL/2, excess anti-PD-L1-IgG was added on the medium. After incubation with anti-PD-L1-IgG, PD-L1-F(ab')<sub>2</sub>-IR700 was then added.

(C) Evaluation of the effect in the spleen of intravenous administration of either anti-PD-L1-IgG or anti-PD-L1-F(ab')<sub>2</sub>. Anti PD-L1 full IgG suppressed PD-L1-expression on antigen-presenting cells (APCs) in the spleen more strongly than anti PD-L1 F(ab')<sub>2</sub>. Data are means  $\pm$  SEMs (n = 5, \*p < 0.05, \*\*p < 0.01, \*\*\*p < 0.001, \*\*\*\*p < 0.0001, Student's t-test)

## Supplementary Figure 2

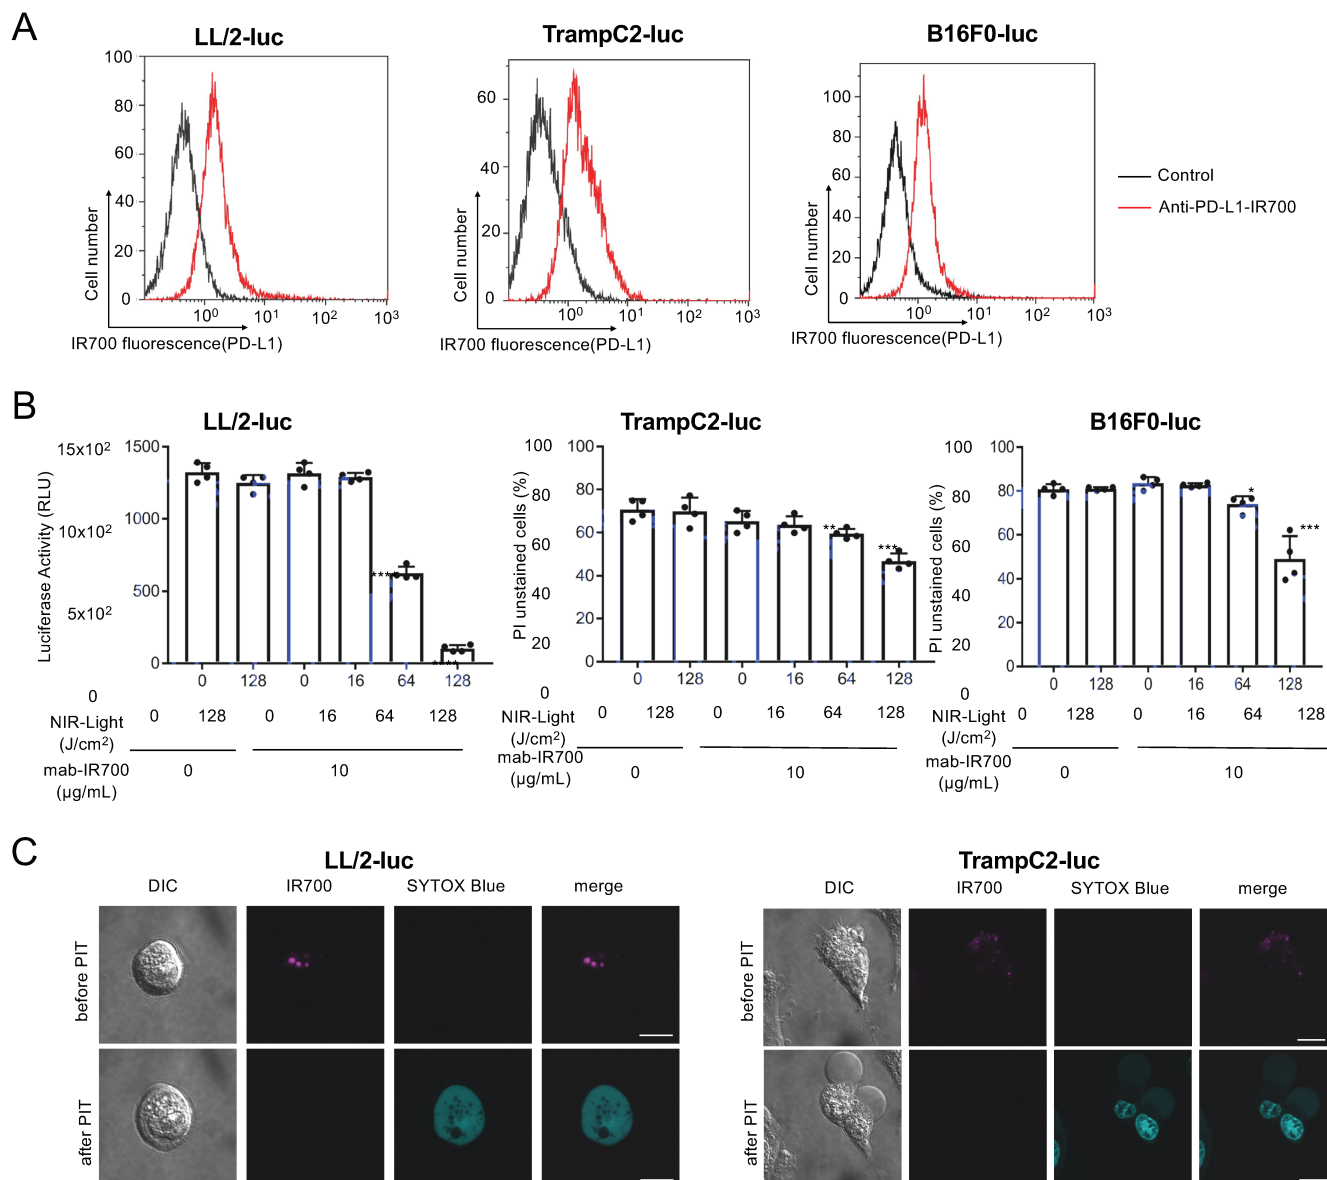

## Supplementary Figure 2

**In vitro** assessment of PD-L1-expression, and evaluation of *in vitro* NIR-PIT with anti-PD-L1- F(ab')<sub>2</sub>-IR700 on various murine tumor cells.

(A) PD-L1-expression in various murine cancer cell lines (LL/2 (lung cancer), Tramp-C2 (prostate cancer), B16F<sub>0</sub> (melanoma)) by flow cytometry. Low expression of PD-L1 was universally detected on the cell lines.

(B) *In vitro* cytotoxicity after PD-L1-targeted NIR-PIT was measured by counting dead cells stained with propidium iodide or luciferase activities, which increased in a NIR-light-dose dependent manner. Data are means  $\pm$  SEMs (n = 4, \* p < 0.05, \*\* p < 0.01, \*\*\* p < 0.001, \*\*\*\* p < 0.0001, Student's t-test)

(C) Microscopic observations before and after *in vitro* PD-L1-targeted NIR-PIT. LL/2-luc or MC38-luc cells were incubated with PD-L1-F(ab')<sub>2</sub>-IR700 for 6 hours and observed with a microscope before and after irradiation with NIR-light (4 J/cm<sup>2</sup>). Necrotic cell death which was stained with SYTOX Blue Dead Cell Stain, was observed after exposure on NIR-light at 20 minutes after NIR-PIT (scale bar, 10  $\mu$ m).

## Supplementary Figure 3

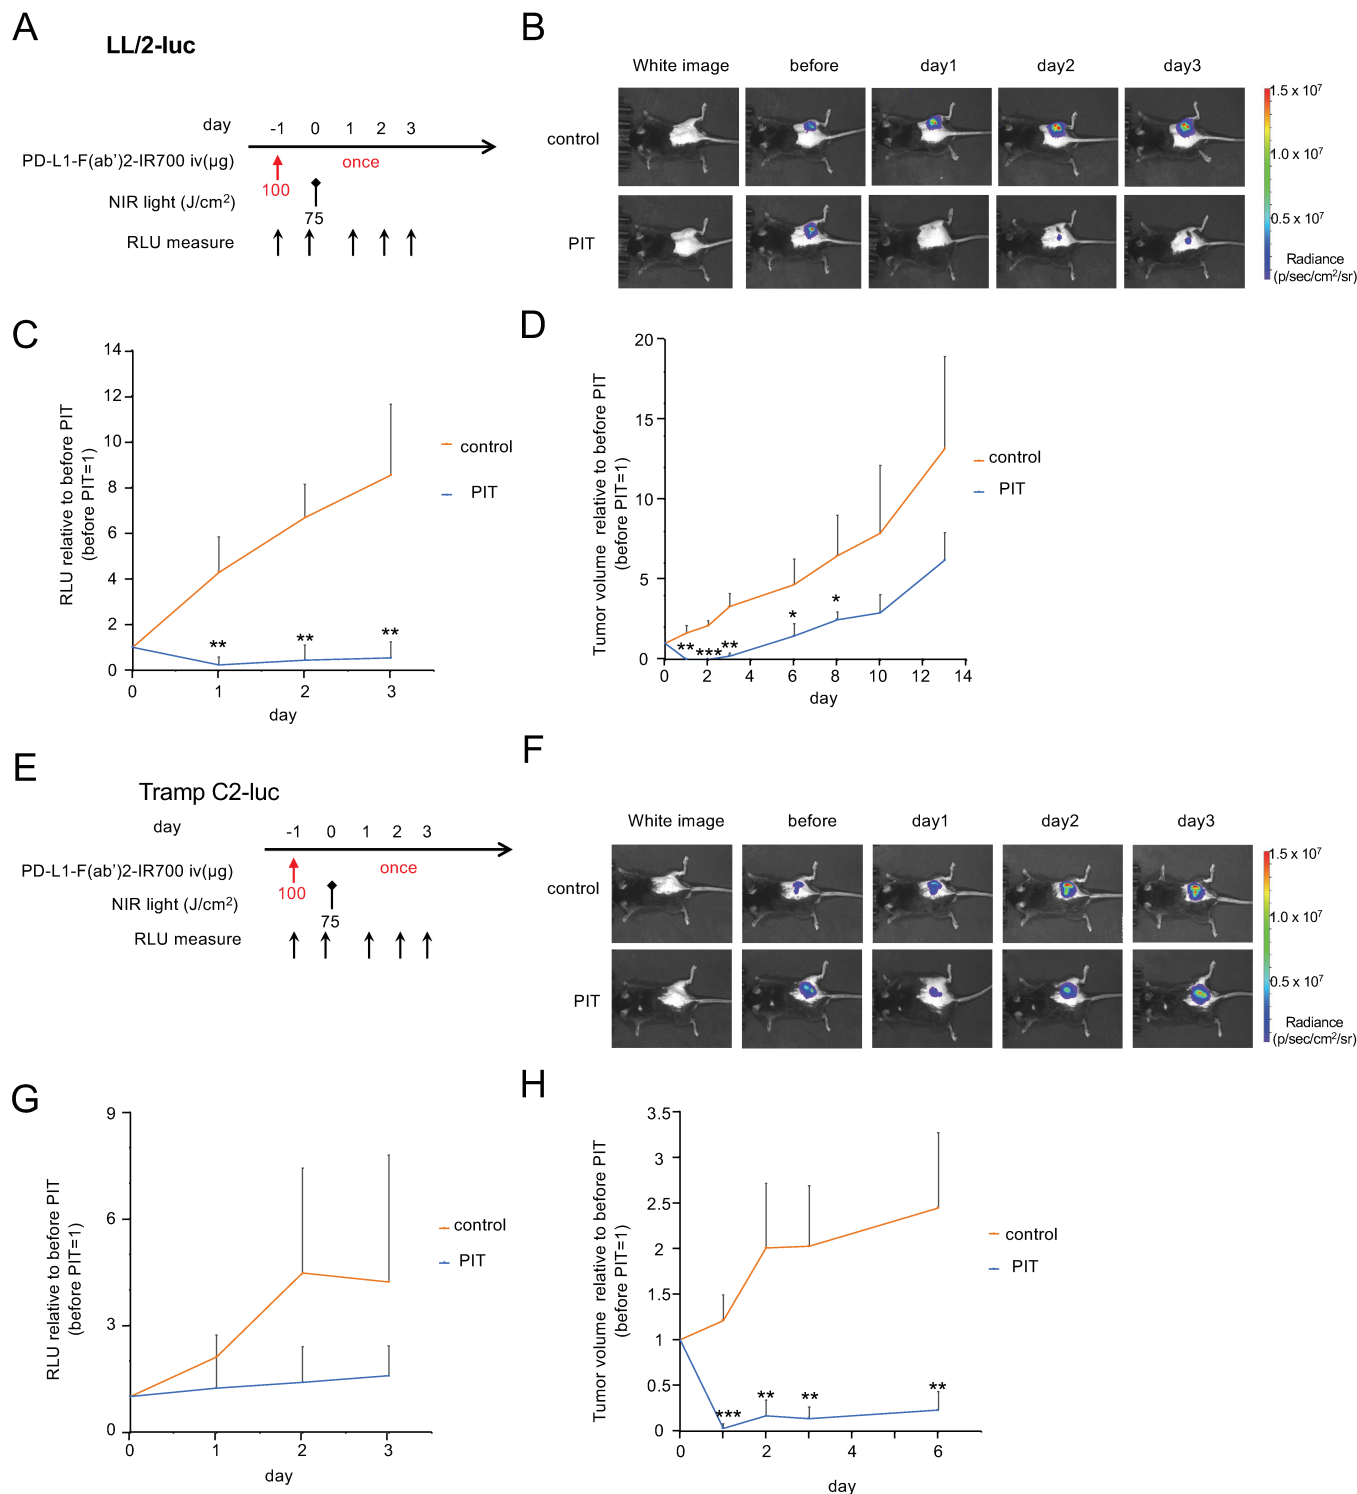

## Supplementary Figure 3

**In vivo NIR-PIT targeting intratumoral PD-L1 induces unexpected remarkable regression of treated various murine tumors.**

(A) PD-L1-targeted NIR-PIT regimen involving PD-L1-F(ab')<sub>2</sub>-IR700 injection, BLI acquisition and NIR-light exposure is indicated.

(B) *In vivo* BLI of LL/2-luc tumor-bearing mice. In the NIR-PIT group, luciferase activity was decreased after irradiation with NIR-light.

(C) Quantitative RLU showed a significant decrease in PD-L1-targeted NIR-PIT-treated LL/2-luc tumors. Data are means  $\pm$  SD (n = 3-4, \*\* p < 0.01, Student's t-test)

(D) Tumor volume ratio (defined as before NIR-PIT = 1) demonstrated that NIR-PIT introduced on day 0 led to significant reductions in the LL/2-luc tumor volume. Data are means  $\pm$  SD (n = 4, \*p < 0.05, \*\*p < 0.001, \*\*\*p < 0.0001, Student's t-test)

(E) *In vivo* BLI of Tramp C2-luc tumor-bearing mice. In the NIR-PIT group, luminescence was decreased after irradiation with NIR-light.

(F) Quantitative RLU showed a decrease in PD-L1-targeted NIR-PIT-treated Tramp C2-luc tumors. Data are means  $\pm$  SD (n = 3-4)

(G) Tumor volume ratio (defined as before NIR-PIT = 1) demonstrated that NIR-PIT introduced on day 0 led to significant reductions in the Tramp C2-luc tumor volume. Data are means  $\pm$  SD (n = 3-4, \*\*p < 0.001, \*\*\*p < 0.0001, Student's t-test).



## Supplementary Figure 4

A

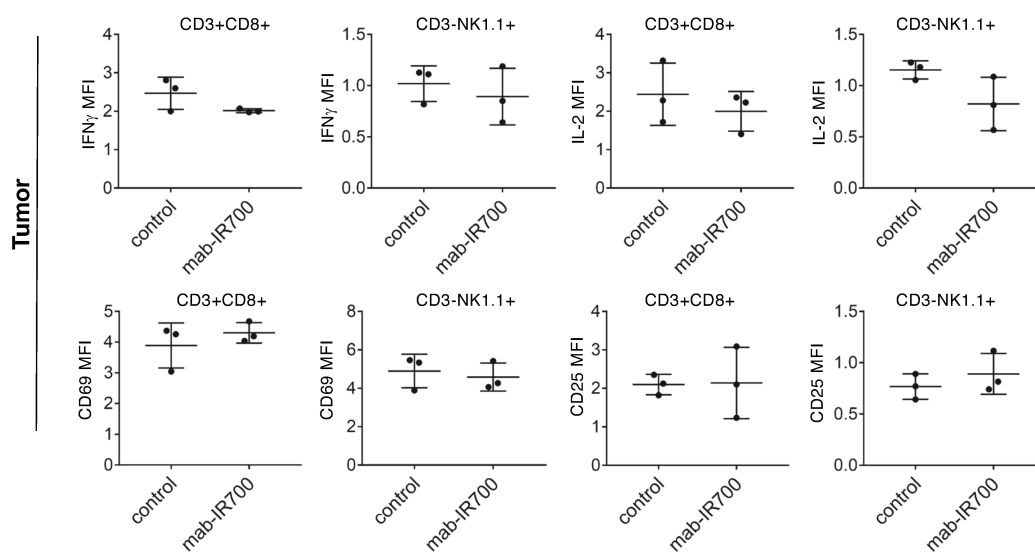

B

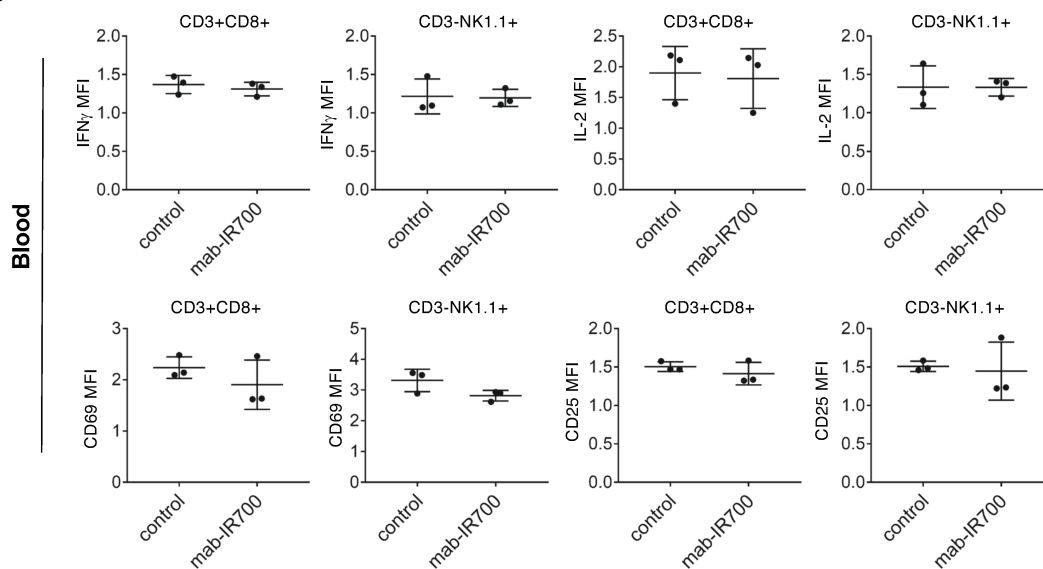

C

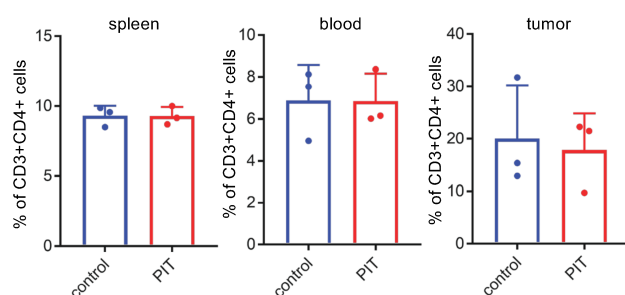

## Supplementary Figure 4

**In vivo injection of PD-L1-F(ab')<sub>2</sub>-IR700 induce no activation of tumor-infiltrating CD8 T and NK cells, and PD-L1-targeted NIR-PIT did not affect on CD4<sup>+</sup>CD25<sup>+</sup>Foxp3<sup>+</sup> regulatory T cells (Tregs).**

(A)(B) Cytotoxic action of intra-tumoral (A) and peripheral blood (B) CD8 T and NK cells was examined by flow cytometry with or without PD-L1-F(ab')<sub>2</sub>-IR700 injection. (n = 3; no significant difference in each activation marker, Student's t-test)

(C) Quantitative data of the percentage of CD25<sup>+</sup>FOXP3<sup>+</sup>Treg in CD4<sup>+</sup> cells in spleen, blood, or tumor, at immediately after PD-L1-targeted NIR-PIT was showed (n = 3; no significant difference, Student's t-test).

## Supplementary Figure 5

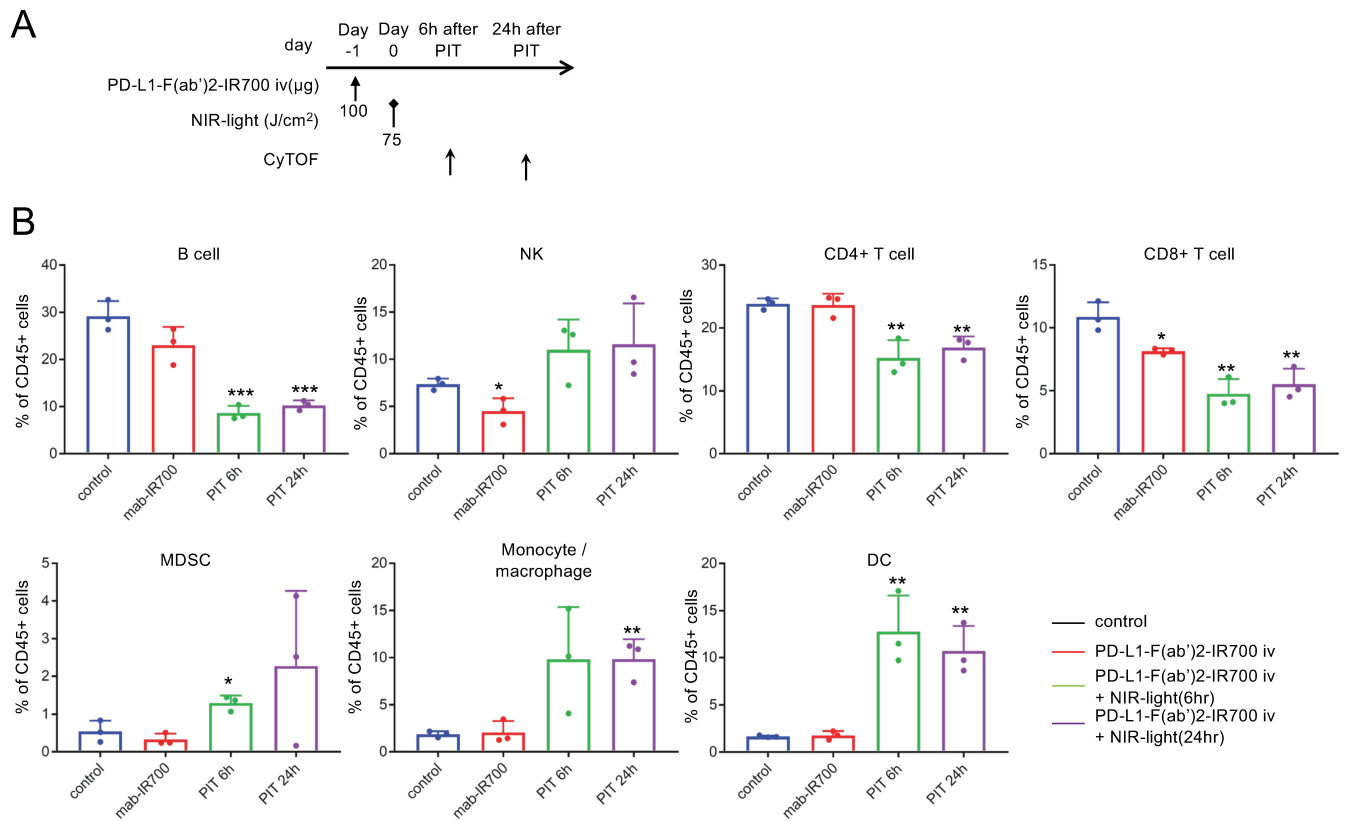**Supplementary Figure 5**

(A) PD-L1-targeted NIR-PIT regimen for CyTOF analysis in blood is indicated. To acquire the immune biomarker, peripheral blood in mice at 6 or 24 hours after the PD-L1-targeted NIR-PIT was analyzed.

(B) Quantitative data of the percentage of CD45+ cells in blood by CyTOF analysis. (n = 3; \*p<0.05, \*\*p<0.01, Student's t-test).

## Supplementary Figure 6

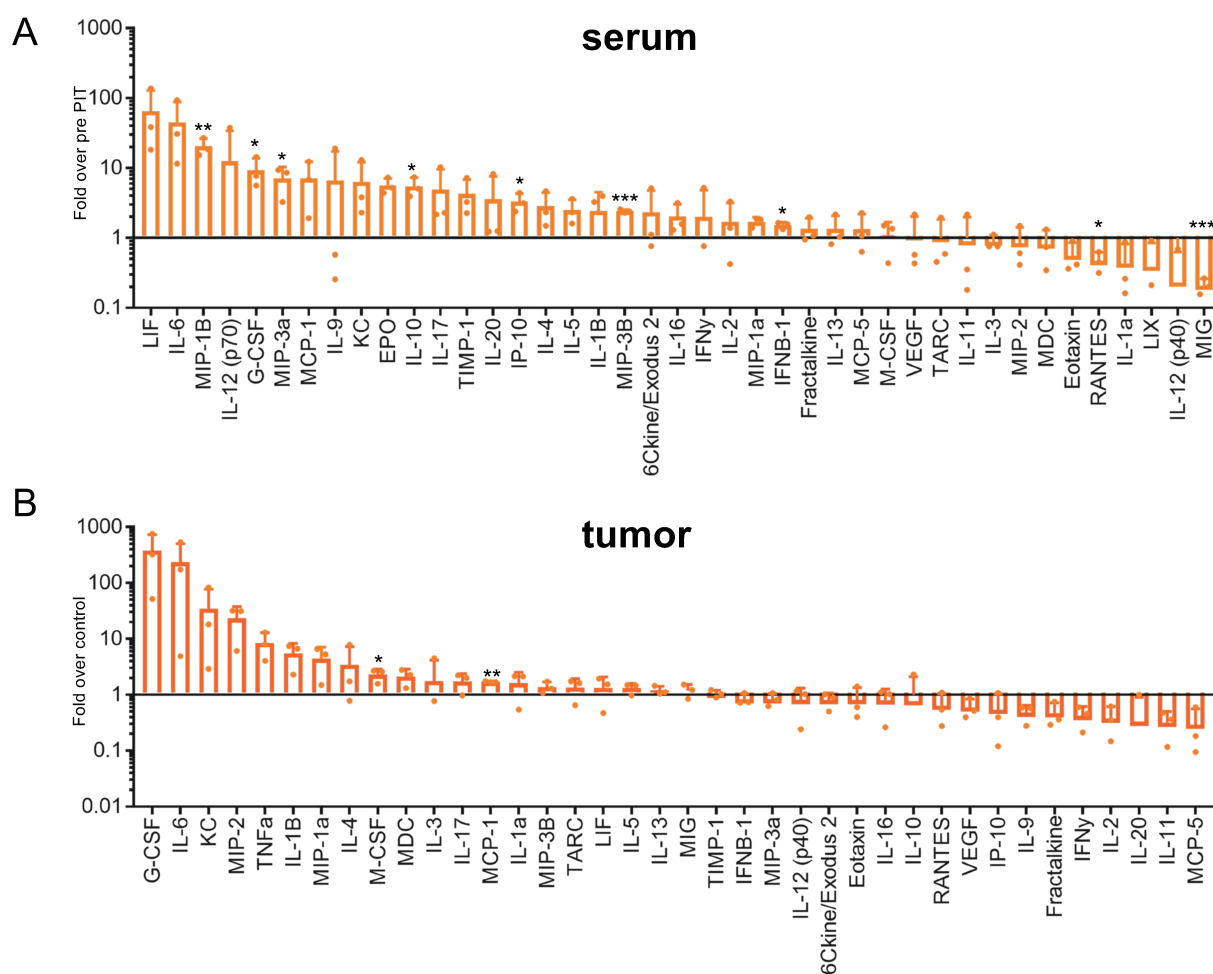

## Supplementary Figure 6

**PD-L1-targeted NIR-PIT induces acute production of cytokines and chemokines in serum and treated tumor.**

(A) Cytokine and chemokine in the serum before and at 6 hours after NIR-light irradiation in the PD-L1-targeted NIR-PIT treated tumor were sequentially measured in each mouse. The results are indicated as fold increase ( $n = 3$ , means  $\pm$  SEMs \* $p < 0.05$ , \*\* $p < 0.01$ , \*\*\* $p < 0.001$ , Student's t-test).

(B) Cytokine and chemokine in the tumor were accessed at 24 hours after NIR-light irradiation and then, compared to that in untreated tumors. The results are indicated as fold increase ( $n = 3$ , means  $\pm$  SEMs \* $p < 0.05$ , \*\* $p < 0.01$ , Student's t-test).

## Supplementary Figure7

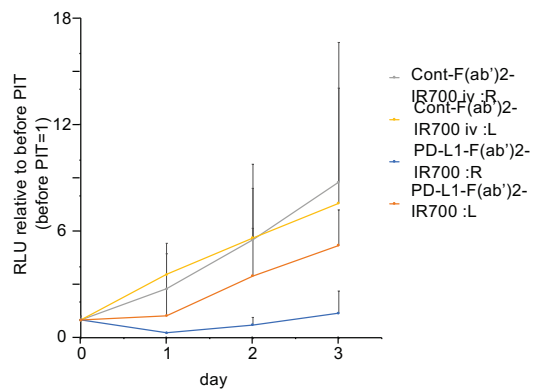**Supplementary Figure 7****The therapeutic effects of PD-L1-targeted NIR-PIT could extend to distant non-NIR-light irradiated tumor; inducing “abscopal-effects”.**

Quantitative RLU showed decrease in both non-irradiated left tumors and NIR-light irradiated tumors with PD-L1-F(ab')<sub>2</sub>-IR700 administration, however, the decrease was not significant. (n = 3 in each group, means ± SD, no significant difference, Tukey's test with ANOVA)

## Supplementary Figure 8

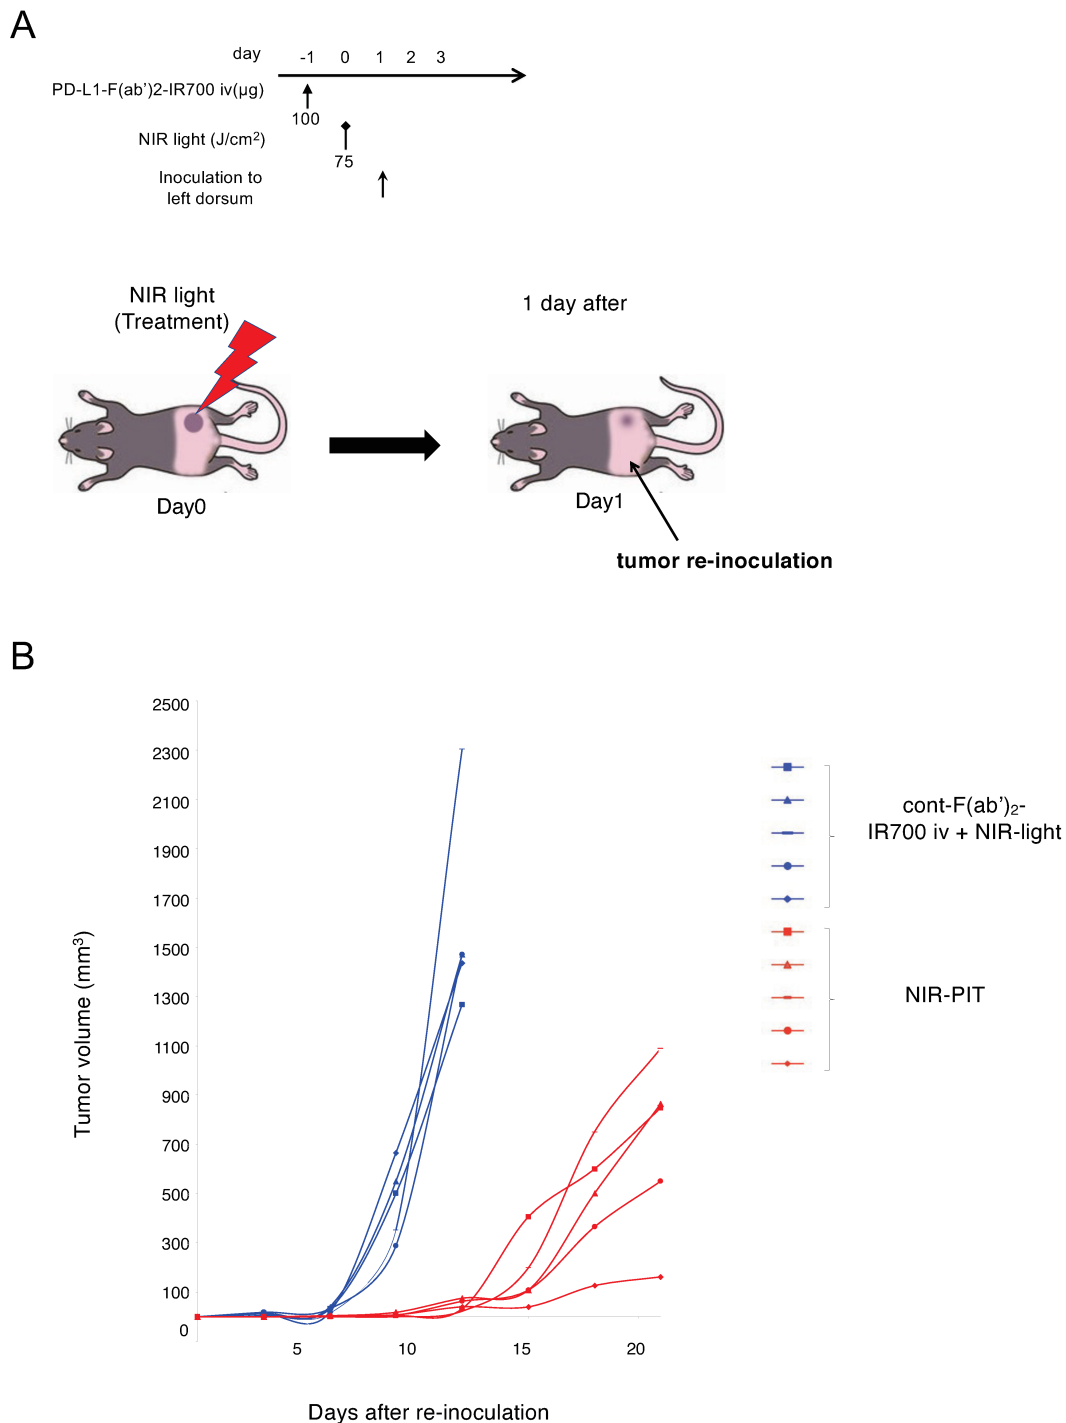

## Supplementary Figure 8

**Local PD-L1-targeted NIR-PIT inhibited the growth of the tumor challenged on the contralateral side.**

(A) The procedure regimen is shown. A schematic representation is also demonstrated.

(B) The growth of MC38-luc tumor inoculated on the contralateral side 1 day after local PD-L1-targeted NIR-PIT of the same tumor type was inhibited compared to that inoculated into control mice received with control-F(ab')<sub>2</sub>-IR700 administration with NIR light irradiation (n = 5 per in each group).
