# Supplementary material for: Spatiotemporal depletion of tumor-associated immune checkpoint PD-L1 with near-infrared photoimmunotherapy promotes antitumor immunity
Source: PubMed Central journal article supplement (PMC8559243; doi:10.1136/jitc-2021-003036), 2021-10-28

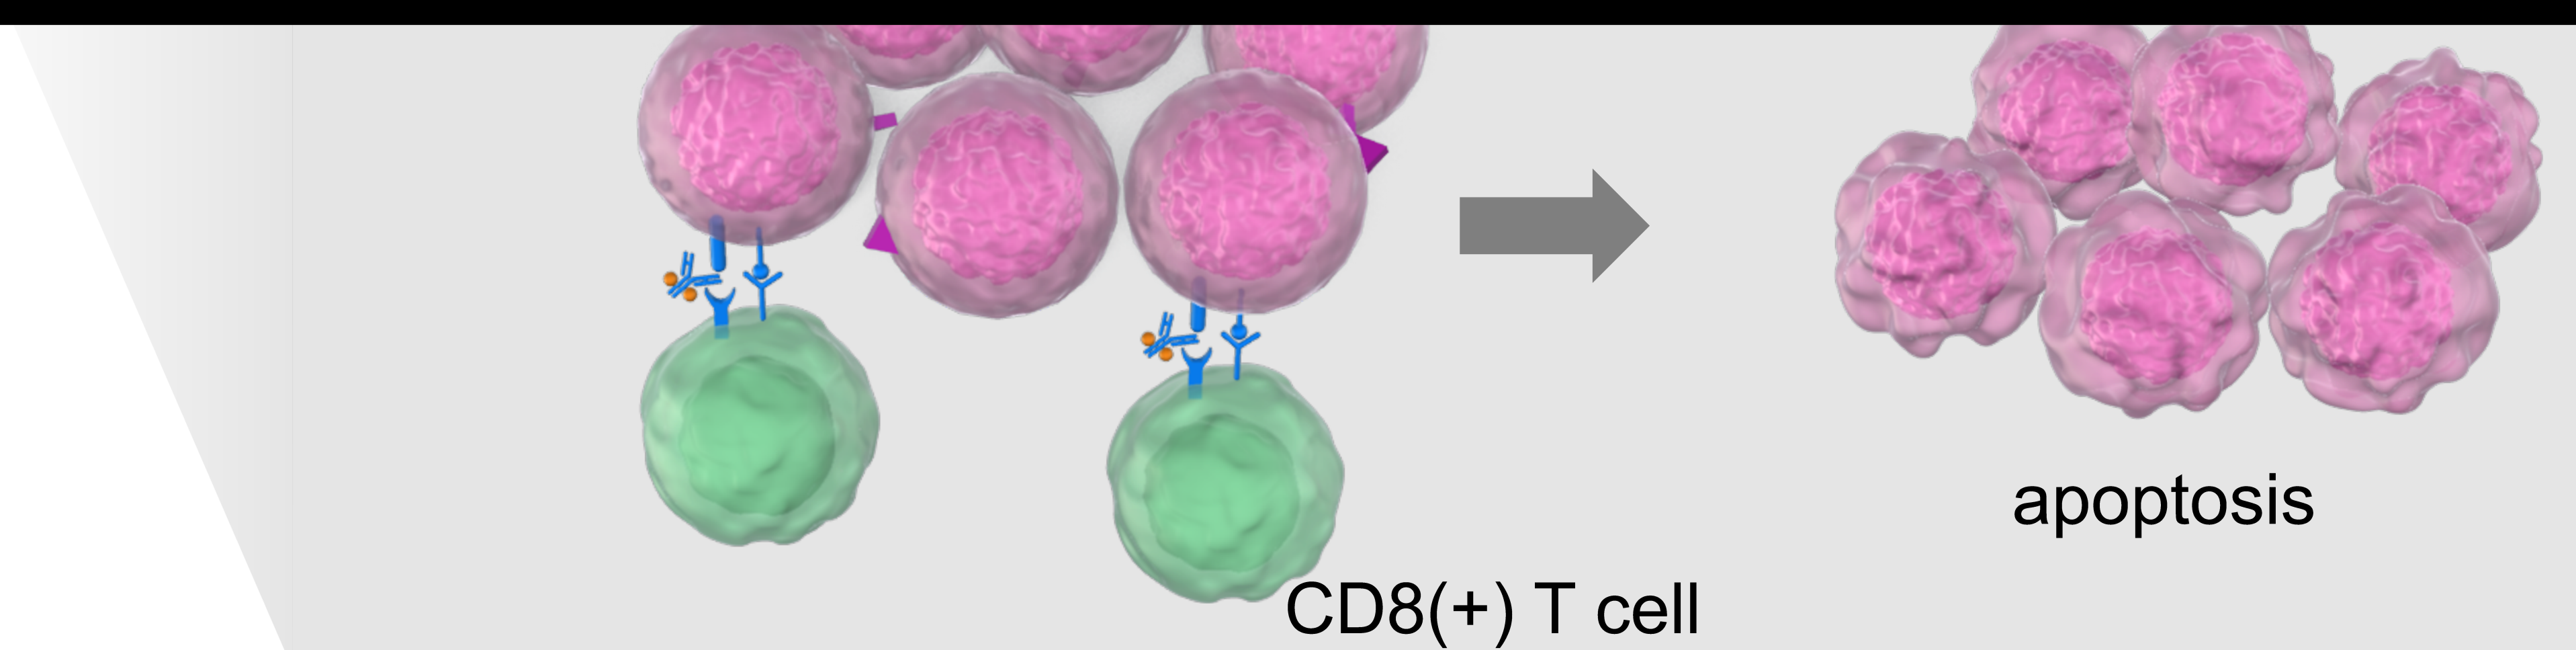

Supplement: jitc-2021-003036supp002.pdf [file jitc-2021-003036supp002.pdf]
